# Supplementary material
Source: PubMed Central journal article supplement (PMC3885871)
Supplement: NIHMS58469-supplement-1.pdf [file NIHMS58469-supplement-1.pdf]

Online Supporting Material

Supplemental Table 1. The fractional synthesis rate of albumin in males and females and younger and older adults in the postabsorptive and postprandial states with 125, 94, and 63 % of the RDA for dietary protein.<sup>1</sup>

| Group                     | State <sup>4</sup> | FSR of Albumin by Protein Trial <sup>2,3</sup> |            |            |
|---------------------------|--------------------|------------------------------------------------|------------|------------|
|                           |                    | P125                                           | P94        | P63        |
|                           |                    | <i>%/d</i>                                     |            |            |
| Males <sup>5</sup> (n=19) | PA                 | 12.3 ± 3.5                                     | 13.0 ± 4.0 | 13.5 ± 3.7 |
|                           | PP                 | 17.6 ± 6.2                                     | 16.0 ± 4.7 | 16.4 ± 5.2 |
| Females (n=17)            | PA                 | 11.0 ± 6.2                                     | 9.8 ± 2.4  | 10.7 ± 4.0 |
|                           | PP                 | 13.6 ± 5.8                                     | 12.1 ± 3.6 | 12.0 ± 5.7 |
| Younger (n=18)            | PA                 | 12.3 ± 6.3                                     | 11.3 ± 3.4 | 12.1 ± 4.4 |
|                           | PP                 | 16.5 ± 7.6                                     | 14.3 ± 4.8 | 14.9 ± 6.5 |
| Older (n=18)              | PA                 | 11.1 ± 3.1                                     | 11.7 ± 4.0 | 12.3 ± 3.8 |
|                           | PP                 | 16.5 ± 7.6                                     | 14.0 ± 4.5 | 13.7 ± 5.1 |

<sup>1</sup>Values are mean ± SD. .

<sup>2</sup>FSR is the fractional synthesis rate in %/day

<sup>3</sup>Protein trial: P125 = 125%; P94 = 94%; and P63 = 63% of the RDA for dietary protein.

<sup>4</sup>State: PA = postabsorptive and PP = postprandial

<sup>5</sup>Different from females, P<0.05

Online Supporting Material

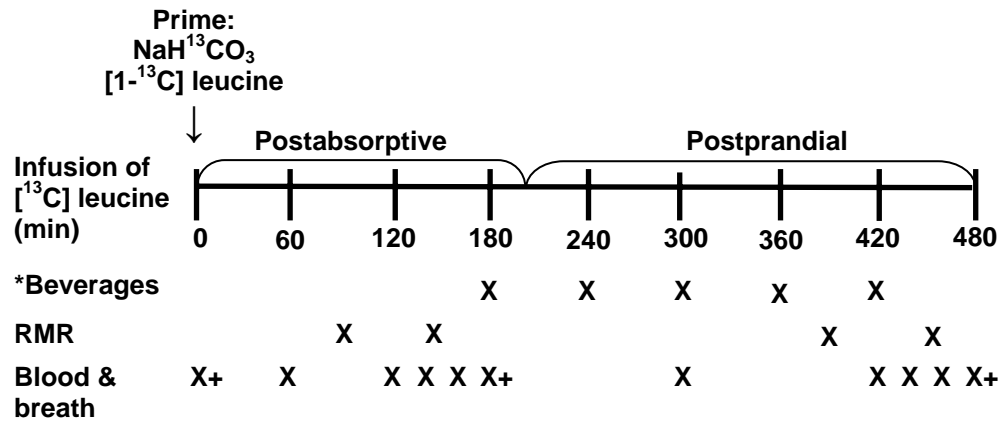

Supplemental Figure 1. Protocol for  $[1-^{13}\text{C}]$  leucine infusion used to measure albumin FSR. **X**, indicates the time that a beverage was provided, a resting metabolic rate (RMR) measurement completed, or blood draw and breath samples were collected. **+**, Time point used to measure  $^{13}\text{C}$ -leucine in albumin. **↓**, indicates the administration of the priming doses of  $\text{NaH}^{13}\text{CO}_3$  and  $[^{13}\text{C}]$  leucine. \*Beverages contain one-twelfth of each subject's estimated daily energy and dietary protein needs.

Online Supporting Material

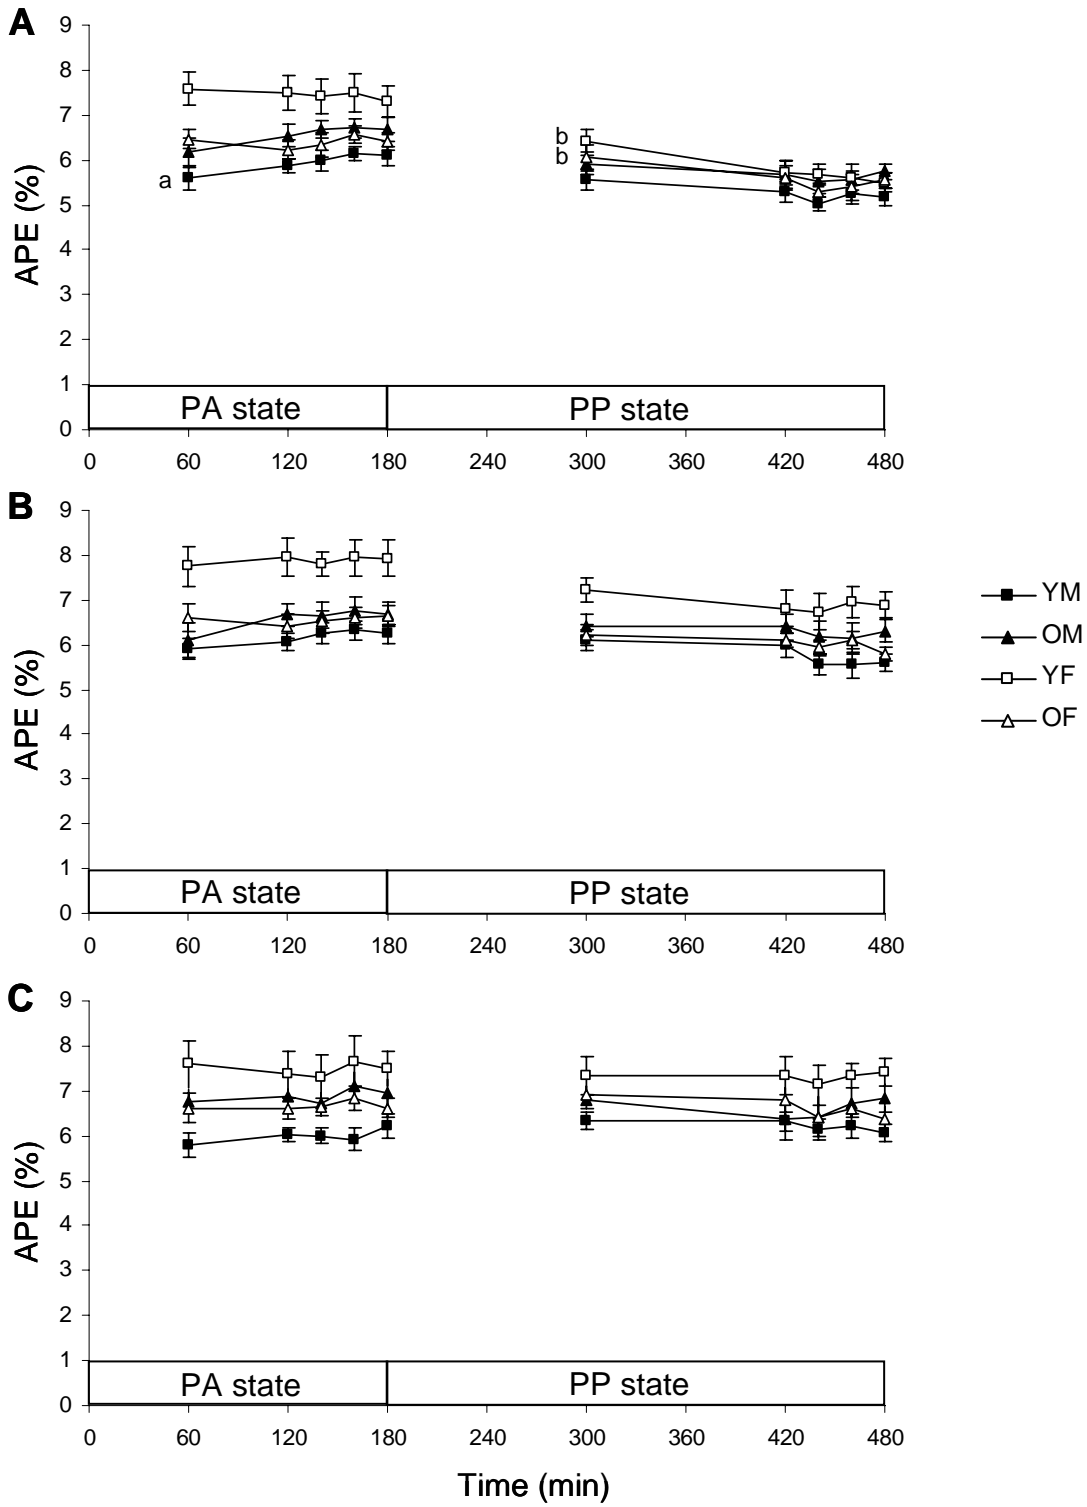

## Online Supporting Material

Supplemental Figure 2. Plasma  $^{13}\text{C}$ -KIC enrichment in atom percent excess (APE, %) during the postabsorptive (PA) and postprandial (PP) states for all groups (YM, younger males; OM, older males; YF, younger females; and OF, older females) during trials (A) P125 = 125% of the RDA for dietary protein (B) P94 = 94% of the RDA for dietary protein and (C) P63 = 63% of the RDA for dietary protein. Steady-state plasma  $^{13}\text{C}$ -KIC enrichment was assessed as the period during the PA and PP states when the slope was not different from zero ( $P < 0.05$ ). The only slopes that were significantly different from zero were for <sup>a</sup>younger men during PA at P125, and <sup>b</sup>younger and older females during PP at P125. Values are means  $\pm$  SEM.
